# Supplementary material for: The Impact of Myosteatosis Percentage on Short-Term Mortality in Patients with Septic Shock
Source: MDPI journal article supplement (doi:10.3390/jcm11113031), 2022-05-27
Supplement: s1 [file s1]

**Table S1. Baseline characteristics of the male patients**

| Characteristics         | Total<br>(n = 527) | Survivor<br>(n = 433) | Non-survivor<br>(n = 94) | <i>p</i> -value |
|-------------------------|--------------------|-----------------------|--------------------------|-----------------|
| Age                     | 67.0 (59.0 – 73.0) | 67.0 (59.0 – 74.0)    | 65.0 (58.0 – 71.0)       | 0.12            |
| Past illness            |                    |                       |                          |                 |
| HTN                     | 175 (33.2)         | 144 (33.3)            | 31 (33.0)                | 0.96            |
| DM                      | 153 (28.8)         | 130 (30.0)            | 22 (23.4)                | 0.20            |
| CAD                     | 60 (11.4)          | 54 (12.5)             | 6 (6.4)                  | 0.09            |
| Pulmonary disease       | 41 (7.18)          | 30 (6.9)              | 11 (11.7)                | 0.12            |
| Malignancy              | 222 (42.1)         | 177 (40.9)            | 45 (47.9)                | 0.21            |
| Hematologic disorder    | 38 (7.2)           | 27 (6.2)              | 11 (11.7)                | 0.06            |
| CKD                     | 31 (5.9)           | 29 (6.7)              | 2 (2.1)                  | 0.09            |
| LC                      | 100 (19.0)         | 76 (17.6)             | 24 (25.5)                | 0.07            |
| Site of infection       |                    |                       |                          |                 |
| Unknown                 | 49 (9.3)           | 39 (9.0)              | 10 (10.6)                | 0.62            |
| Lung                    | 100 (19.0)         | 77 (17.8)             | 23 (24.5)                | 0.13            |
| Urinary tract           | 46 (8.7)           | 42 (9.7)              | 4 (4.3)                  | 0.09            |
| Intra-abdomen           | 82 (15.6)          | 59 (13.6)             | 23 (24.5)                | < 0.01          |
| Hepato-biliary-pancreas | 237 (45.0)         | 204 (47.1)            | 33 (35.1)                | 0.03            |
| Blood stream            | 21 (4.0)           | 13 (3.0)              | 8 (8.5)                  | 0.01            |
| Lactate level           | 4.0 (2.0 – 6.0)    | 3.6 (1.9 – 5.5)       | 5.4 (2.7 – 9.2)          | < 0.01          |
| SOFA score              | 7.0 (5.0 – 10.0)   | 7.0 (5.0 – 10.0)      | 9.0 (6.0 – 12.0)         | < 0.01          |
| APACHE score            | 16.0 (11.0 – 20.0) | 15.0 (11.0 – 19.0)    | 18.0 (14.0 – 22.8)       | < 0.01          |

|               |            |            |           |      |
|---------------|------------|------------|-----------|------|
| Sarcopenia    | 328 (62.2) | 268 (61.9) | 60 (63.8) | 0.73 |
| Myosteatorsis | 419 (79.5) | 339 (78.3) | 80 (85.1) | 0.14 |

Data are presented as n (%) or median (interquartile range).

Abbreviations: HTN, hypertension; DM, diabetes mellitus; CAD, coronary artery disease; CKD, chronic kidney disease; LC, liver cirrhosis; SOFA, sequential organ failure assessment; APACHE, acute physiology and chronic health evaluation.

**Table S2. Baseline characteristics of the female patients**

| Characteristics         | Total<br>(n = 369) | Survivor<br>(n = 317) | Non-survivor<br>(n = 52) | <i>p</i> -value |
|-------------------------|--------------------|-----------------------|--------------------------|-----------------|
| Age                     | 67.0 (57.0 – 76.0) | 68.0 (57.8 – 77.0)    | 65.5 (56.8 – 77.3)       | 0.62            |
| Past illness            |                    |                       |                          |                 |
| HTN                     | 124 (33.6)         | 109 (34.4)            | 15 (28.8)                | 0.43            |
| DM                      | 78 (21.1)          | 65 (20.5)             | 13 (25.0)                | 0.46            |
| CAD                     | 17 (4.6)           | 15 (4.7)              | 2 (3.8)                  | 0.78            |
| Pulmonary disease       | 6 (1.6)            | 4 (1.3)               | 2 (3.8)                  | 0.17            |
| Malignancy              | 155 (42.0)         | 126 (39.7)            | 29 (55.8)                | 0.03            |
| Hematologic disorder    | 20 (5.4)           | 14 (4.4)              | 6 (11.5)                 | 0.04            |
| CKD                     | 20 (5.4)           | 16 (5.0)              | 4 (7.7)                  | 0.44            |
| LC                      | 39 (10.6)          | 32 (10.1)             | 7 (13.5)                 | 0.46            |
| Site of infection       |                    |                       |                          |                 |
| Unknown                 | 33 (8.9)           | 28 (8.8)              | 5 (9.6)                  | 0.86            |
| Lung                    | 47 (12.7)          | 35 (11.0)             | 12 (23.1)                | 0.02            |
| Urinary tract           | 95 (25.7)          | 85 (26.8)             | 10 (19.2)                | 0.25            |
| Intra-abdomen           | 59 (16.0)          | 49 (15.5)             | 10 (19.2)                | 0.49            |
| Hepato-biliary-pancreas | 121 (32.8)         | 107 (33.8)            | 14 (26.9)                | 0.33            |
| Blood stream            | 18 (4.9)           | 13 (4.1)              | 5 (9.6)                  | 0.09            |
| Lactate level           | 3.0 (1.5 – 5.7)    | 2.8 (1.4 – 5.1)       | 5.9 (2.6 – 8.7)          | < 0.01          |
| SOFA score              | 7.0 (5.0 – 9.0)    | 6.0 (5.0 – 8.0)       | 11.0 (6.0 – 14.0)        | < 0.01          |
| APACHE score            | 15.0 (11.0 – 20.0) | 14.0 (11.0 – 19.0)    | 20.5 (15.0 – 30.3)       | < 0.01          |

|               |            |            |           |      |
|---------------|------------|------------|-----------|------|
| Sarcopenia    | 239 (64.8) | 206 (65.0) | 33 (63.5) | 0.83 |
| Myosteatorsis | 313 (84.8) | 268 (84.5) | 45 (86.5) | 0.71 |

---

Data are presented as n (%) or median (interquartile range).

Abbreviations: HTN, hypertension; DM, diabetes mellitus; CAD, coronary artery disease; CKD, chronic kidney disease; LC, liver cirrhosis; SOFA, sequential organ failure assessment; APACHE, acute physiology and chronic health evaluation.
